# Supplementary material
Source: publisher site journal article supplement (https://www.dovepress.com/get_supplementary_file.php?f=196615.docx)
Supplement: Supplementary file 1 [file get_supplementary_file.php]

| **Appendix: List of investigators and their affiliations** | |
| --- | --- |
| **Name** | **Institution** |
| Professor Wanzhen Yao | Peking University Third Hospital |
| Professor Baiqiang Cai | Chinese Academy of Medical Sciences and Peking Union Medical College |
| Professor Kewu Huang | Beijing Chaoyang Hospital |
| Professor Yongchang Sun | Beijing Tongren Hospital |
| Professor Guochao Shi | Shanghai Ruijin Hospital |
| Professor Huili Zhu | Shanghai Huadong Hospital |
| Professor Jinfu Xu | Shanghai Pulmonary Hospital |
| Professor Zhijun Jie | Shanghai Fifth People's Hospital |
| Professor Fan Li | Shanghai Songjiang District Central Hospital |
| Professor Xiwen Gao | Shanghai Minhang District Central Hospital |
| Professor Liwen Lu | Shanghai Fengxian District Central Hospital |
| Professor Jinping Zheng | National Clinical Research Center, Guangzhou Institute of Respiratory Health, First Affiliated Hospital of Guangzhou Medical University |
| Professor Ziwen Zhao | Quangzhou First People's Hospital |
| Professor Mao Huang | Jiangsu Province Hospital |
| Professor Yi Shi | General Hospital of Nanjing Military Region |
| Professor Shujuan Jiang | Shandong Provincial Hospital |
| Professor Jie Cao | Tianjin Medical University General Hospital |
| Professor Zhuang Ma | General Hospital of Shenyang Military Region |
| Professor Liping Peng | First Hospital of Jilin University |
| Professor Jie Zhang | Second Hospital of Jilin University |
| Professor Jingping Yang | Baogang Hospital, Third Affiliated Hospital of Inner Mongolia Medical College, Third School of Clinical Medicine, Inner Mongolia regional medical center |
| Professor Xiuhua Fu | The Affiliated Hospital of Inner Mongolia Medical University |
| Professor Xiaowen Han | Hebei Provincial People's Hospital |
| Professor Xixin Yan | Second Hospital of Hebei Medical University |
| Professor Zheng Liu | China National Petroleum Corporation Central Hospital |
| Professor Aizhen Zhang | Shanxi Provincial People's Hospital |
| Professor Jianying Xu | Shanxi Dayi Hospital |
| Professor Xiaoyun Hu | First Hospital of Shanxi Medical University |
| Professor Hongxia Meng | Yuncheng Central Hospital of Shanxi Province |
| Professor Lijun Ma | Henan Provincial People’s Hospital |
| Professor Jinguang Jia | Zhengzhou People's Hospital |
| Professor Gengyun Sun | First Affiliated Hospital of Anhui Medical University |
| Professor Chen Yusheng | Fujian Provincial Hospital |
| Professor Zuke Xiao | Jiangxi Provincial People's Hospital |
| Professor Hu Ke | Hubei Provincial People's Hospital |
| Professor Bailing Luo | Xiangya Hospital of Central South University |
| Professor Ping Chen | The Second Xiangya Hospital |
| Professor Xuemei Ou | West China Hospital |
| Professor Xiangdong Zhou | Southwest Hospital, The First Affiliated Hospital of the  Third Military Medical University |
| Professor Wei Yao | Xinqiao Hospital of the Third Military Medical University |
| Professor Li Sun | Shaanxi Provincial People's Hospital |
| Professor Jin Faguang | Tangdu Hospital |
| Professor Xiwei Zheng | General Hospital of Ningxia Medical University |
